# Supplementary material for: Rational design of a functionalized metal–organic framework for ratiometric fluorimetric sensing of Hg2+ in environmental water
Source: Royal Society of Chemistry journal article supplement (doi:10.1039/d3ay00546a), 2023-01-01
Supplement: d3ay00546a1.pdf [file d3ay00546a1.pdf]

## Supplementary Information for

# Rational design of a functionalized metal-organic framework for ratiometric fluorimetric sensing Hg<sup>2+</sup> in environmental water

Yanli Li <sup>a,b</sup>, Yanmei Si <sup>a\*</sup>, Genmei Yang <sup>b</sup>, Lixia Yang <sup>b</sup>, Hua Wang <sup>c</sup>

<sup>a</sup> College of Forensic Medicine and Laboratory Medicine, Jining Medical University, Jining 272067, PR China.

<sup>b</sup> College of Environmental and Chemical Engineering, Nanchang Hangkong University, Nanchang 330063, PR China.

<sup>c</sup> School of Life Science, Huzhou University, Huzhou, 313000, PR China.

\*Corresponding authors :      siyanmei90@126.com

## Table of Content

Fig. S1. Size distribution of Eu-MOF/BA.

Fig. S2. Infrared spectra of DCPB and Eu-MOF/BA.

Fig. S3. UV-vis spectra of  $\text{Eu}^{3+}$ , DCPB, Eu-MOF/BA.

Fig. S4. Images of Eu-MOF/BA in the solution of different pH under the UV lamp at 265 nm.

Fig. S5. Images of Eu-MOF/BA in the solution containing various interferents under UV lamp at 265 nm.

Fig. S6.  $^1\text{H}$  NMR spectra of (A) PBA, (B) PBA+ $\text{Hg}^{2+}$ , (C) phenylmercury chloride.

Fig. S7.  $^{13}\text{C}$  NMR spectra of (A) PBA+ $\text{Hg}^{2+}$ , (B) phenylmercury chloride.

Table S1. Comparison of the detection performance among different methods for  $\text{Hg}^{2+}$  assay.

## **Characterization**

Scanning electron microscope (SEM, Hitachi-SU1510) and transmission electron microscope (TEM, FEI Talos F200X) were used to characterize the structural and morphological information of Eu-MOF/BA. X-ray diffraction (XRD) patterns were carried out with an X-ray diffractometer (Bruker, D8 Advance, Germany) with Cu K $\alpha$  radiation ( $\lambda=1.542\text{\AA}$ ). The Fourier transform spectra (FT-IR) were measured using in situ diffuse reflectance infrared Fourier transform spectroscopy (Nicolet IS50, Thermo fisher). The thermogravimetric analysis (TGA) was conducted on the Mettler Toledo TGA / DSC-1 system. UV-Vis-IR spectra were recorded by spectrophotometer (UV-3600 plus). Fluorescence spectra were collected using a fluorescence spectrometer (Hitachi, F4500) under a 270 nm excitation. Parameter setting: scanning speed of 240 nm/min, excitation and emission slit of 5 nm, the voltage of 950 V.

## **Additional figures**

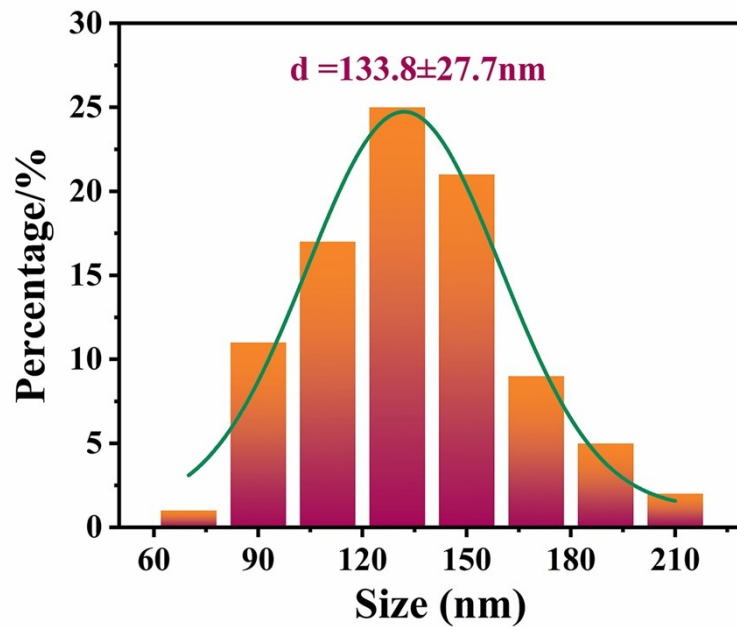

Fig.S1. Size distribution of Eu-MOF/BA.

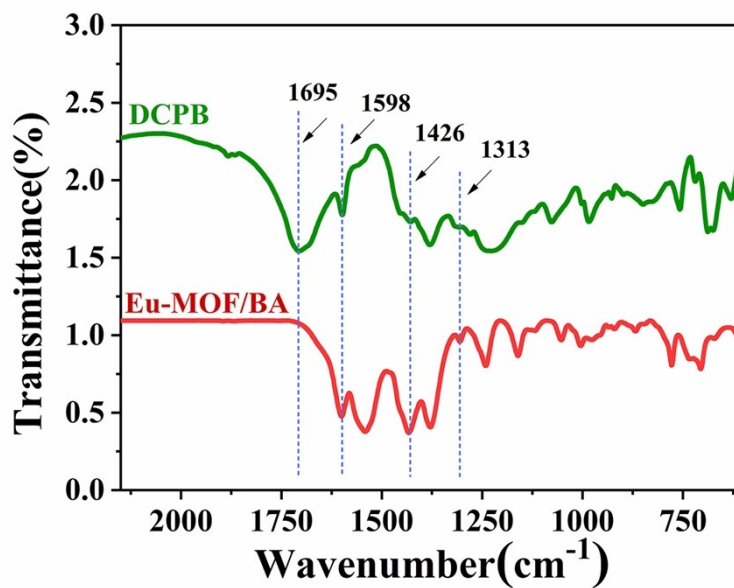

Fig.S2. Infrared spectra of DCPB and Eu-MOF/BA.

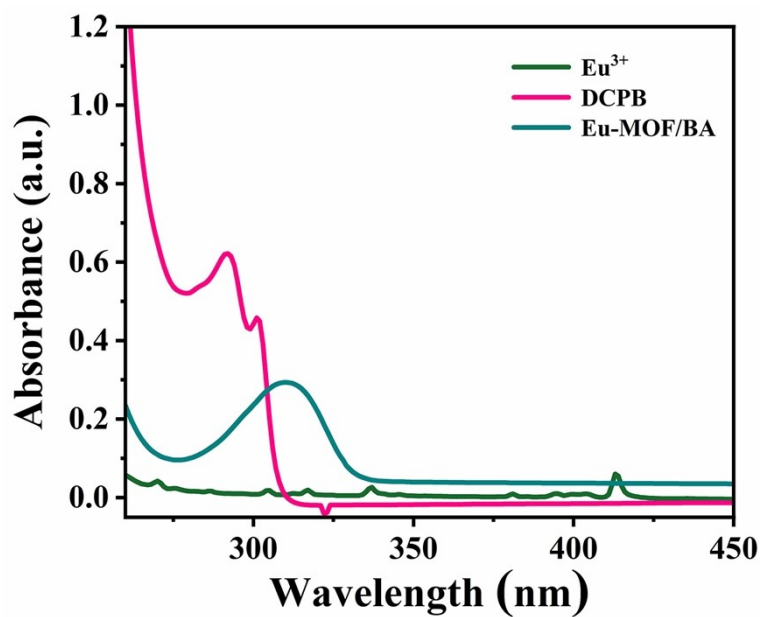

**Fig.S3.** UV-vis spectra of  $\text{Eu}^{3+}$ , DCPB, Eu-MOF/BA.

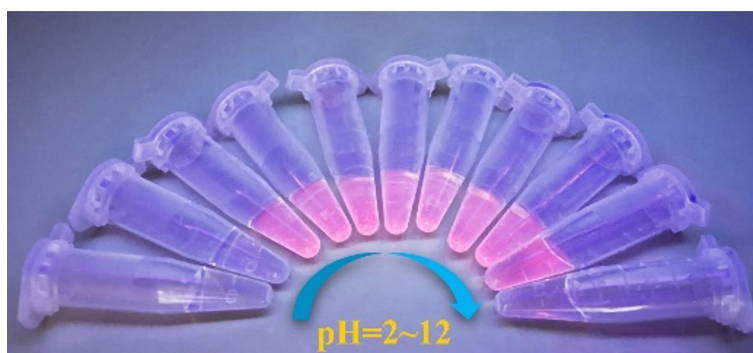

**Fig.S4.** Images of Eu-MOF/BA in the solution of different pH under the UV lamp at 265 nm.

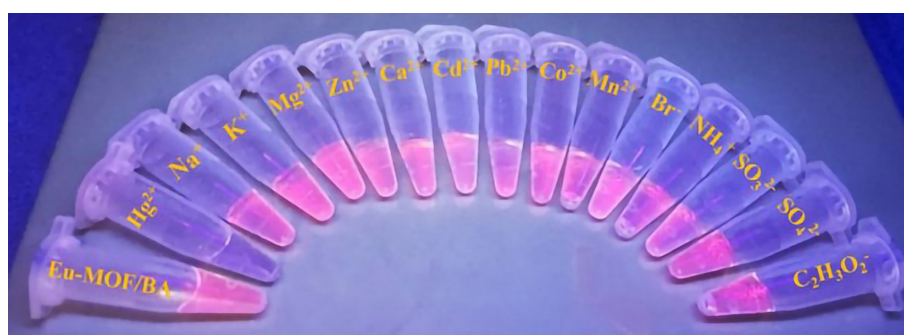

**Fig.S5.** Images of Eu-MOF/BA in the solution containing various interferents under UV lamp at 265 nm.

### (A) $^1\text{H}$ NMR spectra of PBA

$^1\text{H}$  NMR (DMSO- $d_6$ , 500 MHz)  $\delta$  (ppm) 8.03 (s, 2H), 7.79 (d,  $J = 7.5$  Hz, 2H), 7.40-7.38(m, 1H), 7.34-7.31(m, 2H)

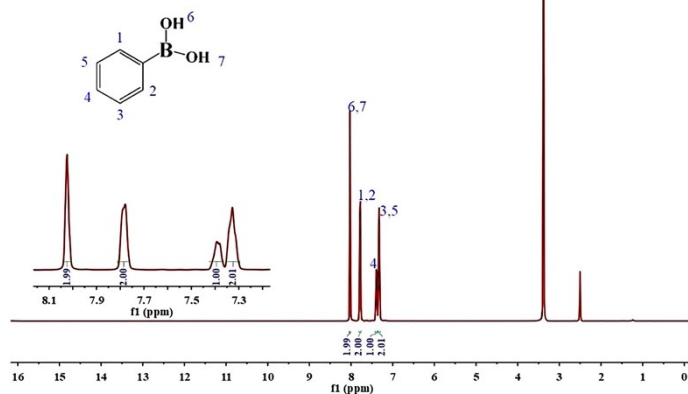

### (B) $^1\text{H}$ NMR spectra of PBA+ $\text{Hg}^{2+}$

$^1\text{H}$  NMR (DMSO- $d_6$ , 500 MHz)  $\delta$  (ppm) 7.44 (d,  $J = 7$  Hz, 2H), 7.30 (t,  $J = 7.5$  Hz, 2H), 7.23 (t,  $J = 7.5$  Hz, 1H)

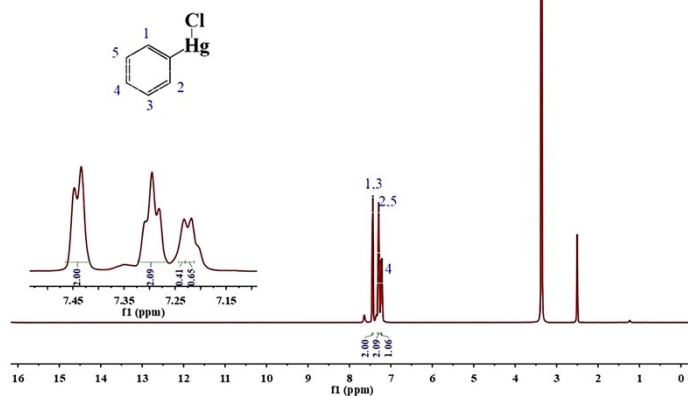

### (C) $^1\text{H}$ NMR spectra of phenylmercury chlorid

$^1\text{H}$  NMR (DMSO- $d_6$ , 500 MHz)  $\delta$  (ppm) 7.44 (d,  $J = 7.5$  Hz, 2H), 7.29 (t,  $J = 8.0$  Hz, 2H), 7.22 (t,  $J = 7.5$  Hz, 1H)

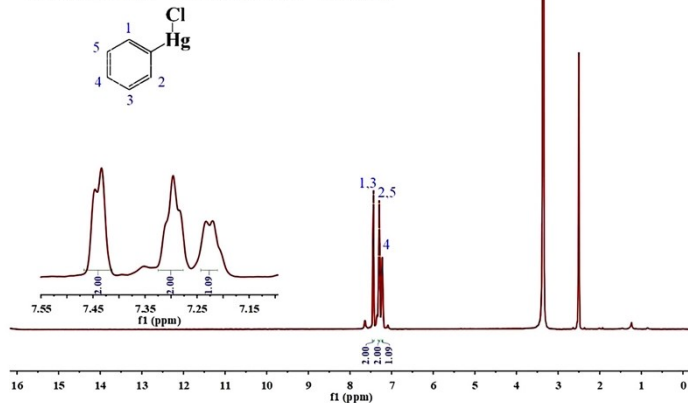

Fig. S6.  $^1\text{H}$  NMR spectra of (A) PBA, (B) PBA+ $\text{Hg}^{2+}$ , (C) phenylmercury chloride.

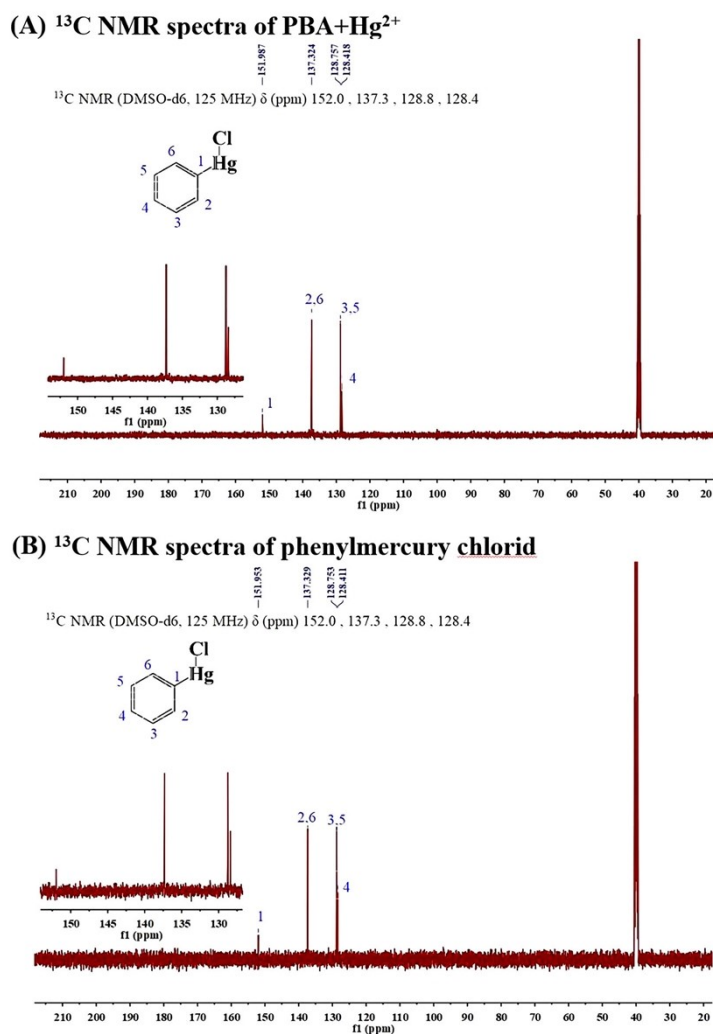

**Fig. S7.**  $^{13}\text{C}$  NMR spectra of (A) PBA+Hg $^{2+}$ , (B) phenylmercury chloride.

**Table S1.** Comparison of the detection performance among different methods for Hg $^{2+}$  assay.

| Methods         | Linear range ( $\mu\text{M}$ ) | LOD (nM) | Refs |
|-----------------|--------------------------------|----------|------|
| Electrochemical | 0.5-50                         | 2        | [1]  |
| SERS            | 0.005-0.5                      | 0.5      | [2]  |
| Colorimetric    | 0.085-4.7                      | 5.88     | [3]  |
| Fluorescent     | 0.1-50                         | 1.6      | [4]  |
| Fluorescent     | 0.01-1                         | 3.65     | [5]  |
| Fluorescent     | 0.0005-50                      | 0.5      | [6]  |
| This work       | 0-50.0                         | 0.0890   | -    |

## Reference

- [1] J. Zhang, X. Xu, L. Chen, An ultrasensitive electrochemical bisphenol A sensor based on hierarchical Ce-metal-organic framework modified with cetyltrimethylammonium bromide, *Sensor. and Actuat. B-Chem.*, 2018, **261**, 425-433.
- [2] S. Ali, M. Mansha, N. Baig, S. A. Khan, Recent trends and future perspectives of emergent analytical techniques for mercury sensing in aquatic environments, *Chem. Rec.*, 2022, **22**, 202100327.
- [3] M. U. Gürbüz, E. Gökhan A. S. Ertürk, Tren-cored PAMAM dendrimer/silver nanocomposites: efficient colorimetric sensors for the determination of mercury ions from aqueous solutions, *Chemistry Select.*, 2019, **4**, 7715-7721.
- [4] Q. Xu, R. G. Su, Y. S. Chen, S. T. Sreenivasan, N. Li, X. S. Zheng, J. F. Zhu, H. B. Pan, W. J. Li, C. M. Xu, Z. H. Xia, L. M. Da, Metal charge transfer doped carbon dots with reversibly switchable, ultra-high quantum yield photoluminescence, *ACS. Appl. Nano. Mater.*, 2018, **1**, 1886-1893.
- [5] S. O. Tümay, V. Şanko, A. Şenocak, E. Demirbas, A hybrid nanosensor based on novel fluorescent iron oxide nanoparticles for highly selective determination of Hg<sup>2+</sup> ions in environmental samples, *New. J. Chem.*, 2021, **45**, 14495-14507.
- [6] S. C. G. Kiruba Daniel, A. Kumar, K. Sivasakthi, C. S. Thakur, Handheld, low-cost electronic device for rapid, real-time fluorescence-based detection of Hg<sup>2+</sup>, using aptamer-templated ZnO quantum dots, *Sensor. and Actuat. B-Chem.*, 2019, **290**, 73-78.
